# Supplementary material
Source: MDPI journal article supplement (https://www.mdpi.com/2077-0472/14/3/431)
Supplement: s1 [file s1]

**Supplementary Table 1: List of SSR markers used for background selection**

| S.No | Marker | Chromosome no |
|------|--------|---------------|
| 1.   | RM3412 | 1             |
| 2.   | RM1    | 1             |
| 3.   | RM5    | 1             |
| 4.   | RM212  | 1             |
| 5.   | RM200  | 1             |
| 6.   | RM490  | 1             |
| 7.   | RM6519 | 2             |
| 8.   | RM2634 | 2             |
| 9.   | RM154  | 2             |
| 10.  | RM233  | 2             |
| 11.  | RM7355 | 2             |
| 12.  | RM1092 | 2             |
| 13.  | RM514  | 3             |
| 14.  | RM5757 | 3             |
| 15.  | RM6959 | 3             |
| 16.  | RM6283 | 3             |
| 17.  | RM3306 | 3             |
| 18.  | RM232  | 3             |
| 19.  | RM251  | 3             |
| 20.  | RM307  | 4             |
| 21.  | RM3843 | 4             |
| 22.  | RM335  | 4             |
| 23.  | RM332  | 4             |
| 24.  | RM255  | 4             |
| 25.  | RM177  | 4             |
| 26.  | RM440  | 5             |
| 27.  | RM122  | 5             |
| 28.  | RM4710 | 5             |
| 29.  | RM1024 | 5             |
| 30.  | RM1182 | 5             |
| 31.  | RM6024 | 5             |
| 32.  | RM574  | 5             |
| 33.  | RM3683 | 5             |
| 34.  | RM508  | 6             |
| 35.  | RM3414 | 6             |
| 36.  | RM584  | 6             |
| 37.  | RM400  | 6             |
| 38.  | RM276  | 6             |
| 39.  | RM432  | 7             |
| 40.  | RM18   | 7             |
| 41.  | RM10   | 7             |
| 42.  | RM420  | 7             |

| S.No | Marker | Chromosome no |
|------|--------|---------------|
| 43.  | RM47   | 7             |
| 44.  | RM11   | 7             |
| 45.  | RM6999 | 8             |
| 46.  | RM152  | 8             |
| 47.  | RM342B | 8             |
| 48.  | RM447  | 8             |
| 49.  | RM5911 | 8             |
| 50.  | RM25   | 8             |
| 51.  | RM502  | 8             |
| 52.  | RM219  | 9             |
| 53.  | RM1328 | 9             |
| 54.  | RM434  | 9             |
| 55.  | RM205  | 9             |
| 56.  | RM288  | 9             |
| 57.  | RM242  | 9             |
| 58.  | RM257  | 9             |
| 59.  | RM4771 | 10            |
| 60.  | RM216  | 10            |
| 61.  | RM5271 | 10            |
| 62.  | RM228  | 10            |
| 63.  | RM222  | 10            |
| 64.  | RM4844 | 11            |
| 65.  | RM286  | 11            |
| 66.  | RM5857 | 11            |
| 67.  | RM287  | 11            |
| 68.  | RM19   | 12            |
| 69.  | RM5341 | 12            |
| 70.  | RM309  | 12            |
| 71.  | RM3331 | 12            |
| 72.  | RM235  | 12            |

**Supplementary Table 2: Spikelet fertility of parents and BILs.**

| Parents/BILs     | <i>qDTY</i><br>1.1 | <i>qDTY</i><br>2.1 | <i>qDTY</i><br>3.1 | Spikelet fertility |           |
|------------------|--------------------|--------------------|--------------------|--------------------|-----------|
|                  |                    |                    |                    | Control            | Stress    |
| IWP              | -                  | -                  | -                  | 90.5±1.5           | 25.2±1.2  |
| 10-1-1-5-23      | +                  | -                  | +                  | 87.3±3.0           | 62.1±1.8* |
| 4-7-4-24-3-41-17 | -                  | +                  | +                  | 90.8±0.9           | 68.2±0.7* |
| 4-7-4-24-3-41-15 | -                  | +                  | +                  | 87.4±0.7           | 64.3±1.6* |
| 4-7-4-24-4-16-30 | -                  | +                  | +                  | 90.4±0.6           | 71.0±1.8* |
| 4-7-4-24-4-16-28 | -                  | +                  | +                  | 92.5±1.4*          | 67.6±0.4* |
| 4-7-4-24-4-16-29 | -                  | +                  | +                  | 89.6±1.7           | 58.9±1.4* |
| 4-7-4-24-3-41-12 | -                  | +                  | +                  | 80.1±1.6           | 56.4±0.9* |
| C.D.<br>(5%)     |                    |                    |                    | 2.187              | 1.764     |

\*Significant at a 5% level.
